# Supplementary material
Source: HighWire-hosted journal article supplement (https://cmaj.ca/highwire/filestream/81271/field_highwire_adjunct_files/0/211215-res-1-at.pdf)
Supplement: 211215-res-1-at.pdf [file 211215-res-1-at.pdf]

## Supplementary Material

**Appendix 1.** Additional information regarding the exposure, outcome, and statistical analysis sections of the methods.

**eTable 1.** Details of study data sources.

**eTable 2.** Conditional diagnosis code inclusion criteria.

**eTable 3.** Number of Major and Minor Anomalies among Pregnancies Exposed During the First Trimester Compared with Unexposed Pregnancies.

**eTable 4.** Marginal Risk Differences of Anomalies per 1000 in Pregnancies Exposed During the First Trimester Compared with Unexposed Pregnancies.

**eTable 5.** Estimated association of an unmeasured confounder between any opioid analgesic exposure and the particular anomaly needed to fully explain the observed association in our population-based cohort.

**eTable 6.** Sensitivity results of simple bias analysis for possible unmeasured confounding.

**Appendix 1.** Additional information regarding the exposure, outcome, and statistical analysis sections of the methods.

## **METHODS**

### **Study Design & Data Sources**

ICES is an independent, non-profit research institute with designation under the Ontario Personal Health Information Protection Act to collect and analyze healthcare data for Ontario residents, without consent, for health system research.

### **Exposure**

The prenatal period was determined by obstetric gestational age from the maternal record in MOMBABY. For pairs for whom this was unavailable ( $N = 2035$ ), gestational age from the infant record in MOMBABY was used. If neither was available in MOMBABY ( $N = 1363$ ), infants with or without an ICD-10-CA preterm indicator were assigned a gestational age of 35 and 39 weeks, respectively, following a validated algorithm.<sup>33</sup>

### **Outcome**

We manually mapped ICD-10-CA codes to the six-digit modified British Pediatric Association codes used by the Metropolitan Atlanta Congenital Defects Program (MACDP). Unspecified and other ICD-10-CA codes were mapped to the corresponding 'NOS' (not otherwise specified) and 'NEC' (not elsewhere classified) MACDP codes, respectively; 'unspecified' codes correspond to diagnoses that cannot be specified further from the medical record, and 'other' codes correspond to diagnoses that do not fit within a general code. A pediatrician (AG) and perinatal epidemiologist (MMW) reviewed the MACDP and ICD-10-CA matching and the resultant list of anomalies.

### **HDPS**

In addition to the *a priori* covariates, variables from the following databases were used as inputs to the HDPS macro to create a propensity score that well balanced exposed and unexposed pairs: 1) diagnostic codes from physician visits in the year prior to pregnancy (OHIP database), 2) diagnostic codes from emergency department visits in the year prior to pregnancy (NACRS database), 3) inpatient diagnostic codes from the hospital discharge abstract in the year prior to pregnancy (CIHI database), and 4) prescription medications excluding opioid analgesics in the year prior to pregnancy (ODB database, available for ODB recipients only).

### **Statistical Analysis**

We report anomalies with six or fewer cases as 5-6 due to ICES privacy restrictions.

**eTable 1.** Details of study data sources.

| <b>Database</b>                                            | <b>Description</b>                                                                                                                             | <b>Variables captured</b>                                                                                                                                                                                                        |
|------------------------------------------------------------|------------------------------------------------------------------------------------------------------------------------------------------------|----------------------------------------------------------------------------------------------------------------------------------------------------------------------------------------------------------------------------------|
| Discharge Abstract Database (DAD)                          | Mandatory discharge abstract submissions from all acute inpatient facilities in Ontario.                                                       |                                                                                                                                                                                                                                  |
| National Ambulatory Care Reporting System Database (NACRS) | Records of all hospital-based and community-based outpatient care, including day surgery, outpatient clinics, and emergency department visits. | ICD-10-CA diagnosis codes, maternal conditions (diabetes, obesity, hypertension), maternal pain diagnosis, Elixhauser comorbidity score.                                                                                         |
| Ontario Health Insurance Plan Claims Database (OHIP)       | Records of universal coverage for medical services to all Ontario residents.                                                                   |                                                                                                                                                                                                                                  |
| Same Day Surgery Database (SDS)                            | Records information for all same day surgical procedures.                                                                                      |                                                                                                                                                                                                                                  |
| MOMBABY                                                    | Linked maternal and infant hospital records (abstracted from DAD).                                                                             |                                                                                                                                                                                                                                  |
| Narcotics Monitoring System (NMS)                          | Collects mandatory information on all prescriptions of controlled drugs issued to Ontario residents, regardless of payment method.             | Drug identification number, description of the product, dispensing date, quantity of drug dispensed, estimated number of days supplied.                                                                                          |
| Registered Person's Database                               | Contains demographic information on all Ontario residents registered under the Ontario Health Insurance Plan (OHIP).                           | Maternal socioeconomic status determined by neighbourhood income quintile using postal code at delivery. Income quintiles were assigned within census areas by the average household size-adjusted income of each neighbourhood. |

**eTable 2.** Conditional diagnosis code inclusion criteria.

| <b>Specific anomaly (ICD-10-CA)</b>                  | <b>Conditional criteria</b>                                                                                                                                                                     |
|------------------------------------------------------|-------------------------------------------------------------------------------------------------------------------------------------------------------------------------------------------------|
| Tetralogy of Fallot (Q213)                           | Do not code the individual components of TOF separately.<br>The individual components are pulmonary or RV flow tract stenosis (Q221), VSD (Q210), dextropositioned or overriding aorta (Q2030). |
| Plagiocephaly (Q673)<br>Dolichocephaly (Q672)        | Never code if craniosynostosis is present (Q750).                                                                                                                                               |
| Ebstein's anomaly (Q225)                             | Do not code tricuspid atresia (Q224) separately, it is a component of Ebstein's anomaly.                                                                                                        |
| Patent Ductus Arteriosus (Q250)                      | If $\geq 36$ weeks gestation always include; if $< 36$ weeks gestation never include.                                                                                                           |
| Inguinal hernia (K400, K401, K402, K403, K404, K409) | If $\geq 36$ weeks gestation and female, then always include;<br>If $< 36$ weeks gestation or male, then never include.                                                                         |
| Torsion of testis (N4400, N4401, N4402, N4408)       | Never code testicular torsion acquired postnatally.                                                                                                                                             |

**eTable 3.** Number of Major and Minor Anomalies among Pregnancies Exposed During the First Trimester Compared with Unexposed Pregnancies.

| No. of Anomalies | Unexposed (N%)                   |                     |                     | Exposed (N%)                  |                    |                    |
|------------------|----------------------------------|---------------------|---------------------|-------------------------------|--------------------|--------------------|
|                  | Any <sup>a</sup><br>(N = 11 931) | Major<br>(N = 9264) | Minor<br>(N = 3762) | Any <sup>a</sup><br>(N = 329) | Major<br>(N = 247) | Minor<br>(N = 112) |
| 1                | 7973 (66.8%)                     | 5440 (58.7%)        | 2533 (67.3%)        | 230 (69.9%)                   | 151 (61.1%)        | 79 (70.5%)         |
| >1               | 3958 (33.2%)                     | 3824 (41.3%)        | 1229 (32.7%)        | 99 (30.1%)                    | 96 (38.9%)         | 33 (29.5%)         |

<sup>a</sup>The sum of 'Major' and 'Minor' anomalies do not sum to the 'Any congenital anomaly' total. This is because pregnancies are only represented once under 'Any congenital anomaly' but may be represented under both 'Major' and 'Minor' anomaly columns if they have >1 anomaly.

**eTable 4.** Marginal Risk Differences of Anomalies per 1000 in Pregnancies Exposed During the First Trimester Compared with Unexposed Pregnancies.

| Anomaly                | Exposure <sup>a</sup> | No. of Infants | No. of infants with anomaly | Marginal Risk Difference per 1000 (95% CI) |                    |
|------------------------|-----------------------|----------------|-----------------------------|--------------------------------------------|--------------------|
|                        |                       |                |                             | Unadjusted                                 | Adjusted with HDPS |
| Any congenital anomaly | None                  | 587 676        | 11 931                      | 1.0                                        | 1.0                |
|                        | Any                   | 11 903         | 329                         | 7.3 (4.4, 10.3)                            | 2.9 (0.1, 5.7)     |
|                        | Codeine               | 6524           | 160                         | 1.9 (0.5, 8.0)                             | 2.1 (-1.5, 5.8)    |
|                        | Morphine              | 670            | 25                          | 17.0 (2.7, 31.4)                           | 18.2 (3.2, 33.1)   |
|                        | Hydromorphone         | 1824           | 49                          | 6.6 (-0.9, 14.0)                           | 2.5 (-4.6, 9.5)    |
|                        | Oxycodone             | 2885           | 87                          | 9.9 (3.6, 16.1)                            | 2.8 (-2.9, 8.6)    |
|                        | Tramadol              | 781            | 38                          | 28.4 (13.3, 43.4)                          | 16.0 (2.4, 29.6)   |
| Major anomalies        | None                  | 587 676        | 9264                        | 1.0                                        | 1.0                |
|                        | Any                   | 11 903         | 247                         | 5.0 (2.4, 7.6)                             | 0.7 (-1.7, 3.1)    |
|                        | Codeine               | 6524           | 121                         | 2.8 (-0.5, 6.1)                            | >0.1 (-3.1, 3.1)   |
|                        | Morphine              | 670            | 20                          | 14.1 (1.2, 27.0)                           | 16.6 (2.8, 30.3)   |
|                        | Hydromorphone         | 1824           | 33                          | 2.3 (-3.8, 8.5)                            | -2.4 (-7.8, 3.0)   |
|                        | Oxycodone             | 2885           | 66                          | 7.1 (1.6, 12.6)                            | -0.5 (-5.2, 4.2)   |
|                        | Tramadol              | 781            | 30                          | 22.6 (9.2, 36.1)                           | 14.8 (2.2, 27.3)   |
| Minor anomalies        | None                  | 587 676        | 3762                        | 1.0                                        | 1.0                |
|                        | Any                   | 11 903         | 112                         | 3.0 (1.3, 4.8)                             | 1.8 (0.1, 3.5)     |
|                        | Codeine               | 6524           | 49                          | 1.1 (-1.0, 3.2)                            | 2.0 (-0.3, 4.3)    |
|                        | Morphine              | 670            | 5-6 <sup>b</sup>            | 2.6 (-4.6, 9.7)                            | 3.3 (-4.3, 10.9)   |
|                        | Hydromorphone         | 1824           | 21                          | 5.1 (0.2, 10.0)                            | 5.7 (0.6, 10.8)    |
|                        | Oxycodone             | 2885           | 32                          | 4.7 (0.9, 8.5)                             | 3.5 (-0.3, 7.2)    |
|                        | Tramadol              | 781            | 12                          | 9.0 (0.3, 17.6)                            | 3.9 (-3.5, 11.2)   |
| Cardiovascular         | None                  | 587 676        | 3130                        | 1.0                                        | 1.0                |
|                        | Any                   | 11 903         | 83                          | 1.6 (0.1, 3.2)                             | 0.7 (-0.8, 2.1)    |
|                        | Codeine               | 6524           | 45                          | 1.6 (-0.4, 3.6)                            | 1.0 (-0.9, 3.0)    |
|                        | Morphine              | 670            | 7                           | 5.1 (-2.6, 12.8)                           | 6.6 (-1.8, 15.0)   |
|                        | Hydromorphone         | 1824           | 8                           | -0.9 (-4.1, 2.1)                           | -1.1 (-4.1, 2.0)   |
|                        | Oxycodone             | 2885           | 20                          | 1.6 (-1.4, 4.6)                            | -1.9 (-4.1, 0.3)   |
|                        | Tramadol              | 781            | 11                          | 8.8 (0.5, 17.0)                            | 2.4 (-4.0, 8.7)    |
| Gastrointestinal       | None                  | 587 676        | 2395                        | 1.0                                        | 1.0                |
|                        | Any                   | 11 903         | 79                          | 2.6 (1.1, 4.0)                             | 1.9 (0.4, 3.3)     |
|                        | Codeine               | 6524           | 41                          | 2.2 (0.3, 4.1)                             | 2.2 (0.2, 4.1)     |
|                        | Morphine              | 670            | 8                           | 7.9 (-0.4, 16.1)                           | 4.3 (-2.8, 11.4)   |
|                        | Hydromorphone         | 1824           | 7                           | -0.2 (-3.1, 2.6)                           | 0.4 (-2.8, 3.5)    |
|                        | Oxycodone             | 2885           | 20                          | 2.9 (-0.2, 5.9)                            | 0.6 (-2.0, 3.2)    |
|                        | Tramadol              | 781            | 10                          | 8.7 (0.8, 16.6)                            | 6.9 (-0.7, 14.5)   |
| Musculoskeletal        | None                  | 587 676        | 1997                        | 1.0                                        | 1.0                |
|                        | Any                   | 11 903         | 54                          | 1.1 (-0.1, 2.4)                            | 0.1 (-1.1, 1.2)    |
|                        | Codeine               | 6524           | 26                          | 0.6 (-0.9, 2.1)                            | 0.8 (-0.8, 2.4)    |
|                        | Hydromorphone         | 1824           | 9                           | 1.5 (-1.7, 4.8)                            | 1.7 (-1.7, 5.0)    |
|                        | Oxycodone             | 2885           | 16                          | 2.1 (-0.6, 4.9)                            | 1.8 (-0.9, 4.6)    |
| Genital                | None                  | 587 676        | 1247                        | 1.0                                        | 1.0                |
|                        | Any                   | 11 903         | 28                          | 0.2 (-0.6, 1.1)                            | 0.1 (-0.7, 1.0)    |
|                        | Codeine               | 6524           | 12                          | >0.1 (-1.3, 0.8)                           | -0.4 (-1.5, 0.6)   |
|                        | Oxycodone             | 2885           | 11                          | 1.7 (-0.6, 3.9)                            | 2.9 (0.2, 5.6)     |

**eTable 4.** Marginal Risk Differences of Anomalies per 1000 in Pregnancies Exposed During the First Trimester Compared with Unexposed Pregnancies (continued).

| Anomaly                | Exposure <sup>a</sup> | No. of Infants | No. of infants with anomaly | Marginal Risk Difference per 1000 (95% CI) |                    |
|------------------------|-----------------------|----------------|-----------------------------|--------------------------------------------|--------------------|
|                        |                       |                |                             | Unadjusted                                 | Adjusted with HDPS |
| Urinary                | None                  | 587 676        | 1351                        | 1.0                                        | 1.0                |
|                        | Any                   | 11 903         | 32                          | 0.4 (-0.5, 1.3)                            | -1.1 (-1.9, -0.3)  |
|                        | Codeine               | 6524           | 12                          | -0.5 (-1.5, 0.6)                           | -0.6 (-1.6, 0.4)   |
|                        | Hydromorphone         | 1824           | 7                           | 1.5 (-1.3, 4.4)                            | -0.8 (-2.6, 1.0)   |
|                        | Oxycodone             | 2885           | 10                          | 1.2 (-1.0, 3.3)                            | 0.2 (-1.7, 2.2)    |
|                        | Tramadol              | 781            | 5-6 <sup>b</sup>            | 4.1 (-1.5, 9.7)                            | 4.5 (-1.5, 10.5)   |
| Neoplasms & tumours    | None                  | 587 676        | 886                         | 1.0                                        | 1.0                |
|                        | Any                   | 11 903         | 22                          | 0.3 (-0.4, 1.1)                            | 0.2 (-0.6, 1.0)    |
|                        | Codeine               | 6524           | 11                          | 0.2 (-0.8, 1.2)                            | 0.1 (-0.9, 1.1)    |
|                        | Tramadol              | 781            | 5-6 <sup>b</sup>            | 4.9 (-0.7, 10.5)                           | 5.6 (-0.5, 11.7)   |
| Central nervous system | None                  | 587 676        | 735                         | 1.0                                        | 1.0                |
|                        | Any                   | 11 903         | 21                          | 0.5 (-0.2, 1.3)                            | 0.0 (-0.7, 0.7)    |
|                        | Codeine               | 6524           | 7                           | -0.2 (-1.0, 0.6)                           | -0.4 (-1.1, 0.3)   |
|                        | Oxycodone             | 2885           | 8                           | 1.5 (-0.4, 3.4)                            | 0.9 (-0.9, 2.6)    |
| Chromosomal            | None                  | 587 676        | 607                         | 1.0                                        | 1.0                |
|                        | Any                   | 11 903         | 17                          | 0.4 (-0.3, 1.1)                            | 0.1 (-0.6, 0.7)    |
|                        | Codeine               | 6524           | 11                          | 0.7 (-0.3, 1.7)                            | 0.3 (-0.6, 1.2)    |
| Oral clefts            | None                  | 587 676        | 610                         | 1.0                                        | 1.0                |
|                        | Any                   | 11 903         | 16                          | 0.3 (-0.4, 1.0)                            | -0.3 (-0.8, 0.2)   |
|                        | Codeine               | 6524           | 7                           | 0.0 (-0.8, 0.8)                            | -0.7 (-1.1, -0.2)  |
|                        | Tramadol              | 781            | 5-6 <sup>b</sup>            | 5.4 (-0.2, 11.0)                           | 0.5 (-2.4, 3.3)    |
| Respiratory            | None                  | 587 676        | 373                         | 1.0                                        | 1.0                |
|                        | Any                   | 11 903         | 8                           | >0.1 (-0.4, 0.5)                           | -0.2 (-0.6, 0.1)   |
| Eye                    | None                  | 587 676        | 278                         | 1.0                                        | 1.0                |
|                        | Any                   | 11 903         | 9                           | 0.3 (-0.2, 0.8)                            | 0.2 (-0.3, 0.7)    |
|                        | Codeine               | 6524           | 5-6 <sup>b</sup>            | 0.3 (-0.4, 1.0)                            | 0.3 (-0.4, 1.0)    |
| Ear, face and neck     | None                  | 587 676        | 283                         | 1.0                                        | 1.0                |
|                        | Any                   | 11 903         | 7                           | 0.1 (-0.3, 0.5)                            | -0.1 (-0.5, 0.2)   |

<sup>a</sup>We present data on specific opioid analgesic agents where at least 5 infants with the anomaly were exposed.

<sup>b</sup>Due to ICES privacy restrictions, we report anomalies with six or fewer cases as 5-6.

**eTable 5.** Estimated association of an unmeasured confounder between any opioid analgesic exposure and the particular anomaly needed to fully explain the observed association in our population-based cohort.

| <b>Anomaly</b>                                 | <b>Risk Ratio</b> |
|------------------------------------------------|-------------------|
| Any congenital anomaly                         | 1.54              |
| Minor congenital anomalies                     | 1.83              |
| Gastrointestinal anomaly                       | 2.28              |
| Stenosis of pulmonary artery                   | 3.02              |
| Ankyloglossia                                  | 3.17              |
| Hypertrophic pyloric stenosis                  | 3.27              |
| Hypertrophic pyloric stenosis (female infants) | 7.40              |

Vanderweele and Ding, *Ann Int Med* 2017<sup>1</sup>



**eTable 6.** Sensitivity results of simple bias analysis for possible unmeasured confounding.

| Association                                           | aRR estimated (95% CI) | aRR corrected (95% CI) | p0    | p1    | RRc |
|-------------------------------------------------------|------------------------|------------------------|-------|-------|-----|
| Neoplasms & Tumours and Tramadol                      | 4.71 (1.98-11.17)      | 4.58 (1.92-10.85)      | 0.009 | 0.068 | 1.5 |
|                                                       |                        | 4.45 (1.87-10.55)      | 0.040 | 0.160 | 1.5 |
|                                                       |                        | 4.39 (1.84-10.40)      | 0.055 | 0.207 | 1.5 |
|                                                       |                        | 4.45 (1.87-10.55)      | 0.009 | 0.068 | 2   |
|                                                       |                        | 4.22 (1.78-10.01)      | 0.040 | 0.160 | 2   |
|                                                       |                        | 4.12 (1.73-9.76)       | 0.055 | 0.207 | 2   |
|                                                       |                        | 4.22 (1.77-10.01)      | 0.009 | 0.068 | 3   |
|                                                       |                        | 3.85 (1.62-9.14)       | 0.040 | 0.160 | 3   |
|                                                       |                        | 3.70 (1.55-8.77)       | 0.055 | 0.207 | 3   |
| Congenital Hypertrophic Pyloric Stenosis and Morphine | 4.03 (1.35-12.03)      | 3.92 (1.31-11.69)      | 0.009 | 0.068 | 1.5 |
|                                                       |                        | 3.81 (1.28-11.36)      | 0.040 | 0.160 | 1.5 |
|                                                       |                        | 3.75 (1.26-11.20)      | 0.055 | 0.207 | 1.5 |
|                                                       |                        | 3.81 (1.28-11.37)      | 0.009 | 0.068 | 2   |
|                                                       |                        | 3.61 (1.21-10.79)      | 0.040 | 0.160 | 2   |
|                                                       |                        | 3.52 (1.18-10.52)      | 0.055 | 0.207 | 2   |
|                                                       |                        | 3.61 (1.21-10.78)      | 0.009 | 0.068 | 3   |
|                                                       |                        | 3.30 (1.10-9.84)       | 0.040 | 0.160 | 3   |
|                                                       |                        | 3.16 (1.06-9.44)       | 0.055 | 0.207 | 3   |
| Urinary Anomalies and Tramadol                        | 2.95 (1.22-7.14)       | 2.87 (1.19-6.94)       | 0.009 | 0.068 | 1.5 |
|                                                       |                        | 2.79 (1.15-6.74)       | 0.040 | 0.160 | 1.5 |
|                                                       |                        | 2.75 (1.14-6.65)       | 0.055 | 0.207 | 1.5 |
|                                                       |                        | 2.79 (1.15-6.75)       | 0.009 | 0.068 | 2   |
|                                                       |                        | 2.64 (1.09-6.40)       | 0.040 | 0.160 | 2   |
|                                                       |                        | 2.58 (1.07-6.24)       | 0.055 | 0.207 | 2   |
|                                                       |                        | 2.64 (1.09-6.40)       | 0.009 | 0.068 | 3   |
|                                                       |                        | 2.41 (1.00-5.84)       | 0.040 | 0.160 | 3   |
|                                                       |                        | 2.32 (0.96-5.60)       | 0.055 | 0.207 | 3   |
| Gastrointestinal Anomalies and Tramadol               | 2.69 (1.34-5.38)       | 2.61 (1.30-5.23)       | 0.009 | 0.068 | 1.5 |
|                                                       |                        | 2.54 (1.27-5.08)       | 0.040 | 0.160 | 1.5 |
|                                                       |                        | 2.50 (1.25-5.01)       | 0.055 | 0.207 | 1.5 |
|                                                       |                        | 2.54 (1.27-5.08)       | 0.009 | 0.068 | 2   |
|                                                       |                        | 2.41 (1.20-4.82)       | 0.040 | 0.160 | 2   |
|                                                       |                        | 2.35 (1.17-4.70)       | 0.055 | 0.207 | 2   |
|                                                       |                        | 2.41 (1.20-4.82)       | 0.009 | 0.068 | 3   |
|                                                       |                        | 2.20 (1.10-4.40)       | 0.040 | 0.160 | 3   |
|                                                       |                        | 2.11 (1.05-4.22)       | 0.055 | 0.207 | 3   |
| Genital Anomalies and Oxycodone                       | 2.36 (1.37-4.06)       | 2.29 (1.33-3.94)       | 0.009 | 0.068 | 1.5 |
|                                                       |                        | 2.23 (1.29-3.83)       | 0.040 | 0.160 | 1.5 |
|                                                       |                        | 2.20 (1.28-3.78)       | 0.055 | 0.207 | 1.5 |
|                                                       |                        | 2.23 (1.29-3.84)       | 0.009 | 0.068 | 2   |
|                                                       |                        | 2.12 (1.23-3.64)       | 0.040 | 0.160 | 2   |
|                                                       |                        | 2.06 (1.20-3.55)       | 0.055 | 0.207 | 2   |
|                                                       |                        | 2.11 (1.23-3.64)       | 0.009 | 0.068 | 3   |
|                                                       |                        | 1.93 (1.12-3.32)       | 0.040 | 0.160 | 3   |
|                                                       |                        | 1.85 (1.08-3.19)       | 0.055 | 0.207 | 3   |

**eTable 6.** Sensitivity results of simple bias analysis for possible unmeasured confounding (continued).

| Association                                          | aRR estimated (95% CI) | aRR corrected (95% CI) | p0    | p1    | RRc |
|------------------------------------------------------|------------------------|------------------------|-------|-------|-----|
| Atrial Septal Defect and Tramadol                    | 2.28 (0.99-5.25)       | 2.21 (0.96-5.10)       | 0.009 | 0.068 | 1.5 |
|                                                      |                        | 2.15 (0.94-4.96)       | 0.040 | 0.160 | 1.5 |
|                                                      |                        | 2.12 (0.92-4.89)       | 0.055 | 0.207 | 1.5 |
|                                                      |                        | 2.15 (0.94-4.96)       | 0.009 | 0.068 | 2   |
|                                                      |                        | 2.04 (0.89-4.71)       | 0.040 | 0.160 | 2   |
|                                                      |                        | 1.99 (0.87-4.59)       | 0.055 | 0.207 | 2   |
|                                                      |                        | 2.04 (0.89-4.70)       | 0.009 | 0.068 | 3   |
|                                                      |                        | 1.87 (0.81-4.30)       | 0.040 | 0.160 | 3   |
|                                                      |                        | 1.79 (0.78-4.12)       | 0.055 | 0.207 | 3   |
| Cardiovascular Anomalies and Morphine                | 2.23 (1.10-4.52)       | 2.17 (1.07-4.39)       | 0.009 | 0.068 | 1.5 |
|                                                      |                        | 2.11 (1.04-4.27)       | 0.040 | 0.160 | 1.5 |
|                                                      |                        | 2.08 (1.02-4.21)       | 0.055 | 0.207 | 1.5 |
|                                                      |                        | 2.11 (1.04-4.27)       | 0.009 | 0.068 | 2   |
|                                                      |                        | 2.00 (0.99-4.05)       | 0.040 | 0.160 | 2   |
|                                                      |                        | 1.95 (0.96-3.95)       | 0.055 | 0.207 | 2   |
|                                                      |                        | 2.00 (0.99-4.05)       | 0.009 | 0.068 | 3   |
|                                                      |                        | 1.82 (0.90-3.70)       | 0.040 | 0.160 | 3   |
|                                                      |                        | 1.75 (0.86-3.55)       | 0.055 | 0.207 | 3   |
| Congenital Hypertrophic Pyloric Stenosis and Codeine | 2.17 (1.34-3.51)       | 2.11 (1.30-3.41)       | 0.009 | 0.068 | 1.5 |
|                                                      |                        | 2.05 (1.27-3.32)       | 0.040 | 0.160 | 1.5 |
|                                                      |                        | 2.02 (1.25-3.27)       | 0.055 | 0.207 | 1.5 |
|                                                      |                        | 2.05 (1.27-3.32)       | 0.009 | 0.068 | 2   |
|                                                      |                        | 1.95 (1.20-3.15)       | 0.040 | 0.160 | 2   |
|                                                      |                        | 1.90 (1.17-3.07)       | 0.055 | 0.207 | 2   |
|                                                      |                        | 1.94 (1.20-3.15)       | 0.009 | 0.068 | 3   |
|                                                      |                        | 1.78 (1.10-2.87)       | 0.040 | 0.160 | 3   |
|                                                      |                        | 1.70 (1.05-2.76)       | 0.055 | 0.207 | 3   |
| Stenosis of Pulmonary Artery and Codeine             | 2.16 (1.03-4.51)       | 2.10 (1.00-4.38)       | 0.009 | 0.068 | 1.5 |
|                                                      |                        | 2.04 (0.97-4.26)       | 0.040 | 0.160 | 1.5 |
|                                                      |                        | 2.01 (0.96-4.20)       | 0.055 | 0.207 | 1.5 |
|                                                      |                        | 2.04 (0.97-4.26)       | 0.009 | 0.068 | 2   |
|                                                      |                        | 1.94 (0.92-4.04)       | 0.040 | 0.160 | 2   |
|                                                      |                        | 1.89 (0.90-3.94)       | 0.055 | 0.207 | 2   |
|                                                      |                        | 1.94 (0.92-4.04)       | 0.009 | 0.068 | 3   |
|                                                      |                        | 1.77 (0.84-3.69)       | 0.040 | 0.160 | 3   |
|                                                      |                        | 1.70 (0.81-3.54)       | 0.055 | 0.207 | 3   |
| Ankyloglossia and Codeine                            | 2.14 (1.35-3.40)       | 2.08 (1.31-3.30)       | 0.009 | 0.068 | 1.5 |
|                                                      |                        | 2.02 (1.28-3.21)       | 0.040 | 0.160 | 1.5 |
|                                                      |                        | 1.99 (1.26-3.17)       | 0.055 | 0.207 | 1.5 |
|                                                      |                        | 2.02 (1.28-3.21)       | 0.009 | 0.068 | 2   |
|                                                      |                        | 1.92 (1.21-3.05)       | 0.040 | 0.160 | 2   |
|                                                      |                        | 1.87 (1.18-2.97)       | 0.055 | 0.207 | 2   |
|                                                      |                        | 1.92 (1.21-3.05)       | 0.009 | 0.068 | 3   |
|                                                      |                        | 1.75 (1.10-2.78)       | 0.040 | 0.160 | 3   |
|                                                      |                        | 1.68 (1.06-2.67)       | 0.055 | 0.207 | 3   |

**eTable 6.** Sensitivity results of simple bias analysis for possible unmeasured confounding (continued).

| Association                                             | aRR estimated (95% CI) | aRR corrected (95% CI) | p0    | p1    | RRc |
|---------------------------------------------------------|------------------------|------------------------|-------|-------|-----|
| Major Anomalies and Morphine                            | 2.05 (1.34-3.13)       | 1.99 (1.30-3.04)       | 0.009 | 0.068 | 1.5 |
|                                                         |                        | 1.94 (1.27-2.96)       | 0.040 | 0.160 | 1.5 |
|                                                         |                        | 1.91 (1.25-2.91)       | 0.055 | 0.207 | 1.5 |
|                                                         |                        | 1.94 (1.27-2.96)       | 0.009 | 0.068 | 2   |
|                                                         |                        | 1.84 (1.20-2.81)       | 0.040 | 0.160 | 2   |
|                                                         |                        | 1.79 (1.17-2.74)       | 0.055 | 0.207 | 2   |
|                                                         |                        | 1.84 (1.20-2.80)       | 0.009 | 0.068 | 3   |
|                                                         |                        | 1.68 (1.10-2.56)       | 0.040 | 0.160 | 3   |
|                                                         |                        | 1.61 (1.05-2.46)       | 0.055 | 0.207 | 3   |
| Major Anomalies and Tramadol                            | 1.94 (1.28-2.92)       | 1.88 (1.24-2.84)       | 0.009 | 0.068 | 1.5 |
|                                                         |                        | 1.83 (1.21-2.76)       | 0.040 | 0.160 | 1.5 |
|                                                         |                        | 1.81 (1.19-2.72)       | 0.055 | 0.207 | 1.5 |
|                                                         |                        | 1.83 (1.21-2.76)       | 0.009 | 0.068 | 2   |
|                                                         |                        | 1.74 (1.15-2.62)       | 0.040 | 0.160 | 2   |
|                                                         |                        | 1.70 (1.12-2.55)       | 0.055 | 0.207 | 2   |
|                                                         |                        | 1.74 (1.15-2.62)       | 0.009 | 0.068 | 3   |
|                                                         |                        | 1.59 (1.05-2.39)       | 0.040 | 0.160 | 3   |
|                                                         |                        | 1.52 (1.00-2.29)       | 0.055 | 0.207 | 3   |
| Congenital Hypertrophic Pyloric Stenosis and Any Opioid | 1.93 (1.32-2.82)       | 1.87 (1.28-2.74)       | 0.009 | 0.068 | 1.5 |
|                                                         |                        | 1.82 (1.25-2.66)       | 0.040 | 0.160 | 1.5 |
|                                                         |                        | 1.80 (1.23-2.63)       | 0.055 | 0.207 | 1.5 |
|                                                         |                        | 1.82 (1.25-2.66)       | 0.009 | 0.068 | 2   |
|                                                         |                        | 1.73 (1.18-2.53)       | 0.040 | 0.160 | 2   |
|                                                         |                        | 1.69 (1.15-2.46)       | 0.055 | 0.207 | 2   |
|                                                         |                        | 1.73 (1.18-2.53)       | 0.009 | 0.068 | 3   |
|                                                         |                        | 1.58 (1.08-2.31)       | 0.040 | 0.160 | 3   |
|                                                         |                        | 1.52 (1.04-2.21)       | 0.055 | 0.207 | 3   |
| Any Congenital Anomaly and Morphine                     | 1.89 (1.28-2.79)       | 1.84 (1.24-2.71)       | 0.009 | 0.068 | 1.5 |
|                                                         |                        | 1.79 (1.21-2.64)       | 0.040 | 0.160 | 1.5 |
|                                                         |                        | 1.76 (1.19-2.60)       | 0.055 | 0.207 | 1.5 |
|                                                         |                        | 1.79 (1.21-2.64)       | 0.009 | 0.068 | 2   |
|                                                         |                        | 1.69 (1.15-2.50)       | 0.040 | 0.160 | 2   |
|                                                         |                        | 1.65 (1.12-2.44)       | 0.055 | 0.207 | 2   |
|                                                         |                        | 1.69 (1.15-2.50)       | 0.009 | 0.068 | 3   |
|                                                         |                        | 1.55 (1.05-2.28)       | 0.040 | 0.160 | 3   |
|                                                         |                        | 1.48 (1.00-2.19)       | 0.055 | 0.207 | 3   |
| Minor Anomalies and Hydromorphone                       | 1.89 (1.23-2.89)       | 1.84 (1.19-2.81)       | 0.009 | 0.068 | 1.5 |
|                                                         |                        | 1.79 (1.16-2.73)       | 0.040 | 0.160 | 1.5 |
|                                                         |                        | 1.76 (1.15-2.69)       | 0.055 | 0.207 | 1.5 |
|                                                         |                        | 1.79 (1.16-2.73)       | 0.009 | 0.068 | 2   |
|                                                         |                        | 1.69 (1.10-2.59)       | 0.040 | 0.160 | 2   |
|                                                         |                        | 1.65 (1.08-2.53)       | 0.055 | 0.207 | 2   |
|                                                         |                        | 1.69 (1.10-2.59)       | 0.009 | 0.068 | 3   |
|                                                         |                        | 1.55 (1.01-2.36)       | 0.040 | 0.160 | 3   |
|                                                         |                        | 1.48 (0.97-2.27)       | 0.055 | 0.207 | 3   |

**eTable 6.** Sensitivity results of simple bias analysis for possible unmeasured confounding (continued).

| Association                                 | aRR estimated (95% CI) | aRR corrected (95% CI) | p0    | p1    | RRc |
|---------------------------------------------|------------------------|------------------------|-------|-------|-----|
| Ankyloglossia and Any Opioid                | 1.88 (1.30-2.72)       | 1.83 (1.26-2.64)       | 0.009 | 0.068 | 1.5 |
|                                             |                        | 1.78 (1.23-2.57)       | 0.040 | 0.160 | 1.5 |
|                                             |                        | 1.75 (1.21-2.53)       | 0.055 | 0.207 | 1.5 |
|                                             |                        | 1.78 (1.23-2.57)       | 0.009 | 0.068 | 2   |
|                                             |                        | 1.69 (1.17-2.44)       | 0.040 | 0.160 | 2   |
|                                             |                        | 1.64 (1.14-2.38)       | 0.055 | 0.207 | 2   |
|                                             |                        | 1.68 (1.16-2.44)       | 0.009 | 0.068 | 3   |
|                                             |                        | 1.54 (1.06-2.23)       | 0.040 | 0.160 | 3   |
|                                             |                        | 1.48 (1.02-2.14)       | 0.055 | 0.207 | 3   |
| Stenosis of Pulmonary Artery and Any Opioid | 1.81 (0.99-3.31)       | 1.76 (0.96-3.22)       | 0.009 | 0.068 | 1.5 |
|                                             |                        | 1.71 (0.94-3.13)       | 0.040 | 0.160 | 1.5 |
|                                             |                        | 1.69 (0.92-3.08)       | 0.055 | 0.207 | 1.5 |
|                                             |                        | 1.71 (0.94-3.13)       | 0.009 | 0.068 | 2   |
|                                             |                        | 1.62 (0.89-2.97)       | 0.040 | 0.160 | 2   |
|                                             |                        | 1.58 (0.87-2.89)       | 0.055 | 0.207 | 2   |
|                                             |                        | 1.62 (0.89-2.97)       | 0.009 | 0.068 | 3   |
|                                             |                        | 1.48 (0.81-2.71)       | 0.040 | 0.160 | 3   |
|                                             |                        | 1.42 (0.78-2.60)       | 0.055 | 0.207 | 3   |
| Any Congenital Anomaly and Tramadol         | 1.79 (1.23-2.60)       | 1.74 (1.19-2.53)       | 0.009 | 0.068 | 1.5 |
|                                             |                        | 1.69 (1.16-2.46)       | 0.040 | 0.160 | 1.5 |
|                                             |                        | 1.67 (1.15-2.42)       | 0.055 | 0.207 | 1.5 |
|                                             |                        | 1.69 (1.16-2.46)       | 0.009 | 0.068 | 2   |
|                                             |                        | 1.60 (1.10-2.33)       | 0.040 | 0.160 | 2   |
|                                             |                        | 1.56 (1.08-2.27)       | 0.055 | 0.207 | 2   |
|                                             |                        | 1.60 (1.10-2.33)       | 0.009 | 0.068 | 3   |
|                                             |                        | 1.46 (1.01-2.13)       | 0.040 | 0.160 | 3   |
|                                             |                        | 1.41 (0.97-2.04)       | 0.055 | 0.207 | 3   |
| Ventricular Septal Defect and Codeine       | 1.59 (0.95-2.67)       | 1.54 (0.92-2.59)       | 0.009 | 0.068 | 1.5 |
|                                             |                        | 1.50 (0.90-2.52)       | 0.040 | 0.160 | 1.5 |
|                                             |                        | 1.48 (0.88-2.49)       | 0.055 | 0.207 | 1.5 |
|                                             |                        | 1.50 (0.90-2.52)       | 0.009 | 0.068 | 2   |
|                                             |                        | 1.43 (0.85-2.39)       | 0.040 | 0.160 | 2   |
|                                             |                        | 1.39 (0.83-2.33)       | 0.055 | 0.207 | 2   |
|                                             |                        | 1.42 (0.85-2.39)       | 0.009 | 0.068 | 3   |
|                                             |                        | 1.30 (0.78-2.18)       | 0.040 | 0.160 | 3   |
|                                             |                        | 1.25 (0.75-2.10)       | 0.055 | 0.207 | 3   |
| Minor Anomalies and Oxycodone               | 1.54 (1.05-2.26)       | 1.50 (1.02-2.20)       | 0.009 | 0.068 | 1.5 |
|                                             |                        | 1.45 (0.99-2.13)       | 0.040 | 0.160 | 1.5 |
|                                             |                        | 1.43 (0.98-2.10)       | 0.055 | 0.207 | 1.5 |
|                                             |                        | 1.45 (0.99-2.14)       | 0.009 | 0.068 | 2   |
|                                             |                        | 1.38 (0.94-2.03)       | 0.040 | 0.160 | 2   |
|                                             |                        | 1.35 (0.92-1.98)       | 0.055 | 0.207 | 2   |
|                                             |                        | 1.38 (0.94-2.03)       | 0.009 | 0.068 | 3   |
|                                             |                        | 1.26 (0.86-1.85)       | 0.040 | 0.160 | 3   |
|                                             |                        | 1.21 (0.82-1.77)       | 0.055 | 0.207 | 3   |

**eTable 6.** Sensitivity results of simple bias analysis for possible unmeasured confounding (continued).

| Association                                                                                      | aRR estimated (95% CI) | aRR corrected (95% CI) | p0    | p1    | RRc |
|--------------------------------------------------------------------------------------------------|------------------------|------------------------|-------|-------|-----|
| Gastrointestinal Anomalies and Codeine                                                           | 1.53 (1.12-2.09)       | 1.49 (1.09-2.03)       | 0.009 | 0.068 | 1.5 |
|                                                                                                  |                        | 1.45 (1.06-1.97)       | 0.040 | 0.160 | 1.5 |
|                                                                                                  |                        | 1.42 (1.04-1.95)       | 0.055 | 0.207 | 1.5 |
|                                                                                                  |                        | 1.45 (1.06-1.97)       | 0.009 | 0.068 | 2   |
|                                                                                                  |                        | 1.37 (1.00-1.87)       | 0.040 | 0.160 | 2   |
|                                                                                                  |                        | 1.34 (0.98-1.83)       | 0.055 | 0.207 | 2   |
|                                                                                                  |                        | 1.37 (1.00-1.87)       | 0.009 | 0.068 | 3   |
|                                                                                                  |                        | 1.25 (0.92-1.71)       | 0.040 | 0.160 | 3   |
|                                                                                                  |                        | 1.20 (0.88-1.64)       | 0.055 | 0.207 | 3   |
| Gastrointestinal Anomalies and Any Opioid                                                        | 1.46 (1.15-1.85)       | 1.42 (1.12-1.80)       | 0.009 | 0.068 | 1.5 |
|                                                                                                  |                        | 1.38 (1.09-1.75)       | 0.040 | 0.160 | 1.5 |
|                                                                                                  |                        | 1.36 (1.07-1.72)       | 0.055 | 0.207 | 1.5 |
|                                                                                                  |                        | 1.38 (1.09-1.75)       | 0.009 | 0.068 | 2   |
|                                                                                                  |                        | 1.31 (1.03-1.66)       | 0.040 | 0.160 | 2   |
|                                                                                                  |                        | 1.28 (1.01-1.62)       | 0.055 | 0.207 | 2   |
|                                                                                                  |                        | 1.31 (1.03-1.66)       | 0.009 | 0.068 | 3   |
|                                                                                                  |                        | 1.19 (0.94-1.51)       | 0.040 | 0.160 | 3   |
|                                                                                                  |                        | 1.15 (0.90-1.45)       | 0.055 | 0.207 | 3   |
| Any Congenital Anomaly and Oxycodone<br><i>(including exposure four weeks before conception)</i> | 1.31 (1.07-1.60)       | 1.27 (1.04-1.55)       | 0.009 | 0.068 | 1.5 |
|                                                                                                  |                        | 1.24 (1.01-1.51)       | 0.040 | 0.160 | 1.5 |
|                                                                                                  |                        | 1.22 (1.00-1.49)       | 0.055 | 0.207 | 1.5 |
|                                                                                                  |                        | 1.24 (1.01-1.51)       | 0.009 | 0.068 | 2   |
|                                                                                                  |                        | 1.17 (0.96-1.43)       | 0.040 | 0.160 | 2   |
|                                                                                                  |                        | 1.15 (0.94-1.40)       | 0.055 | 0.207 | 2   |
|                                                                                                  |                        | 1.17 (0.96-1.43)       | 0.009 | 0.068 | 3   |
|                                                                                                  |                        | 1.07 (0.88-1.31)       | 0.040 | 0.160 | 3   |
|                                                                                                  |                        | 1.03 (0.84-1.26)       | 0.055 | 0.207 | 3   |
| Minor Anomalies and Codeine                                                                      | 1.31 (1.00-1.72)       | 1.27 (0.97-1.67)       | 0.009 | 0.068 | 1.5 |
|                                                                                                  |                        | 1.24 (0.94-1.62)       | 0.040 | 0.160 | 1.5 |
|                                                                                                  |                        | 1.22 (0.93-1.60)       | 0.055 | 0.207 | 1.5 |
|                                                                                                  |                        | 1.24 (0.94-1.62)       | 0.009 | 0.068 | 2   |
|                                                                                                  |                        | 1.17 (0.90-1.54)       | 0.040 | 0.160 | 2   |
|                                                                                                  |                        | 1.15 (0.87-1.50)       | 0.055 | 0.207 | 2   |
|                                                                                                  |                        | 1.17 (0.90-1.54)       | 0.009 | 0.068 | 3   |
|                                                                                                  |                        | 1.07 (0.82-1.41)       | 0.040 | 0.160 | 3   |
|                                                                                                  |                        | 1.03 (0.79-1.35)       | 0.055 | 0.207 | 3   |
| Minor Anomalies and Any Opioid                                                                   | 1.26 (1.03-1.53)       | 1.22 (1.00-1.49)       | 0.009 | 0.068 | 1.5 |
|                                                                                                  |                        | 1.19 (0.97-1.45)       | 0.040 | 0.160 | 1.5 |
|                                                                                                  |                        | 1.17 (0.96-1.42)       | 0.055 | 0.207 | 1.5 |
|                                                                                                  |                        | 1.19 (0.97-1.45)       | 0.009 | 0.068 | 2   |
|                                                                                                  |                        | 1.13 (0.92-1.37)       | 0.040 | 0.160 | 2   |
|                                                                                                  |                        | 1.10 (0.90-1.34)       | 0.055 | 0.207 | 2   |
|                                                                                                  |                        | 1.13 (0.92-1.37)       | 0.009 | 0.068 | 3   |
|                                                                                                  |                        | 1.03 (0.84-1.25)       | 0.040 | 0.160 | 3   |
|                                                                                                  |                        | 0.99 (0.81-1.20)       | 0.055 | 0.207 | 3   |

**eTable 6.** Sensitivity results of simple bias analysis for possible unmeasured confounding (continued).

| Association                                                                                              | aRR estimated (95% CI) | aRR corrected (95% CI) | p <sub>0</sub> | p <sub>1</sub> | RR <sub>c</sub> |
|----------------------------------------------------------------------------------------------------------|------------------------|------------------------|----------------|----------------|-----------------|
| Any Congenital Anomaly and Hydromorphone<br><br><i>(including exposure four weeks before conception)</i> | 1.22 (0.95-1.56)       | 1.19 (0.92-1.52)       | 0.009          | 0.068          | 1.5             |
|                                                                                                          |                        | 1.15 (0.90-1.47)       | 0.040          | 0.160          | 1.5             |
|                                                                                                          |                        | 1.14 (0.88-1.45)       | 0.055          | 0.207          | 1.5             |
|                                                                                                          |                        | 1.15 (0.90-1.47)       | 0.009          | 0.068          | 2               |
|                                                                                                          |                        | 1.09 (0.85-1.40)       | 0.040          | 0.160          | 2               |
|                                                                                                          |                        | 1.07 (0.83-1.36)       | 0.055          | 0.207          | 2               |
|                                                                                                          |                        | 1.09 (0.85-1.40)       | 0.009          | 0.068          | 3               |
|                                                                                                          |                        | 1.00 (0.78-1.28)       | 0.040          | 0.160          | 3               |
|                                                                                                          |                        | 0.96 (0.75-1.22)       | 0.055          | 0.207          | 3               |
| Atrial Septal Defect and Any Opioid                                                                      | 1.22 (0.91-1.62)       | 1.19 (0.88-1.57)       | 0.009          | 0.068          | 1.5             |
|                                                                                                          |                        | 1.15 (0.86-1.53)       | 0.040          | 0.160          | 1.5             |
|                                                                                                          |                        | 1.14 (0.85-1.51)       | 0.055          | 0.207          | 1.5             |
|                                                                                                          |                        | 1.15 (0.86-1.53)       | 0.009          | 0.068          | 2               |
|                                                                                                          |                        | 1.09 (0.82-1.45)       | 0.040          | 0.160          | 2               |
|                                                                                                          |                        | 1.07 (0.80-1.42)       | 0.055          | 0.207          | 2               |
|                                                                                                          |                        | 1.09 (0.82-1.45)       | 0.009          | 0.068          | 3               |
|                                                                                                          |                        | 1.00 (0.74-1.33)       | 0.040          | 0.160          | 3               |
|                                                                                                          |                        | 0.96 (0.71-1.27)       | 0.055          | 0.207          | 3               |
| Any Congenital Anomaly and Codeine<br><br><i>(including exposure four weeks before conception)</i>       | 1.13 (0.99-1.29)       | 1.10 (0.96-1.25)       | 0.009          | 0.068          | 1.5             |
|                                                                                                          |                        | 1.07 (0.94-1.22)       | 0.040          | 0.160          | 1.5             |
|                                                                                                          |                        | 1.05 (0.92-1.20)       | 0.055          | 0.207          | 1.5             |
|                                                                                                          |                        | 1.07 (0.94-1.22)       | 0.009          | 0.068          | 2               |
|                                                                                                          |                        | 1.01 (0.89-1.16)       | 0.040          | 0.160          | 2               |
|                                                                                                          |                        | 0.99 (0.87-1.13)       | 0.055          | 0.207          | 2               |
|                                                                                                          |                        | 1.01 (0.89-1.16)       | 0.009          | 0.068          | 3               |
|                                                                                                          |                        | 0.92 (0.81-1.06)       | 0.040          | 0.160          | 3               |
|                                                                                                          |                        | 0.89 (0.78-1.01)       | 0.055          | 0.207          | 3               |
| Any Congenital Anomaly and Any Opioid                                                                    | 1.14 (1.01-1.28)       | 1.11 (0.98-1.24)       | 0.009          | 0.068          | 1.5             |
|                                                                                                          |                        | 1.08 (0.95-1.21)       | 0.040          | 0.160          | 1.5             |
|                                                                                                          |                        | 1.06 (0.94-1.19)       | 0.055          | 0.207          | 1.5             |
|                                                                                                          |                        | 1.08 (0.95-1.21)       | 0.009          | 0.068          | 2               |
|                                                                                                          |                        | 1.02 (0.91-1.15)       | 0.040          | 0.160          | 2               |
|                                                                                                          |                        | 1.00 (0.88-1.12)       | 0.055          | 0.207          | 2               |
|                                                                                                          |                        | 1.02 (0.91-1.15)       | 0.009          | 0.068          | 3               |
|                                                                                                          |                        | 0.93 (0.83-1.05)       | 0.040          | 0.160          | 3               |
|                                                                                                          |                        | 0.89 (0.79-1.00)       | 0.055          | 0.207          | 3               |
| Major Anomalies and Any Opioid                                                                           | 1.04 (0.91-1.20)       | 1.01 (0.88-1.17)       | 0.009          | 0.068          | 1.5             |
|                                                                                                          |                        | 0.98 (0.86-1.13)       | 0.040          | 0.160          | 1.5             |
|                                                                                                          |                        | 0.97 (0.85-1.12)       | 0.055          | 0.207          | 1.5             |
|                                                                                                          |                        | 0.98 (0.86-1.13)       | 0.009          | 0.068          | 2               |
|                                                                                                          |                        | 0.93 (0.82-1.08)       | 0.040          | 0.160          | 2               |
|                                                                                                          |                        | 0.91 (0.80-1.05)       | 0.055          | 0.207          | 2               |
|                                                                                                          |                        | 0.93 (0.82-1.08)       | 0.009          | 0.068          | 3               |
|                                                                                                          |                        | 0.85 (0.74-0.98)       | 0.040          | 0.160          | 3               |
|                                                                                                          |                        | 0.82 (0.71-0.94)       | 0.055          | 0.207          | 3               |

Abbreviations: aRR, Adjusted Risk Ratio: estimated in study and corrected for unmeasured confounding; p<sub>1</sub>, prevalence of confounder in opioid analgesic exposed, p<sub>0</sub>, prevalence of confounder in opioid analgesic unexposed; RR<sub>c</sub>, association between the confounder and the risk of anomaly.

## References

1. VanderWeele TJ, Ding P. Sensitivity Analysis in Observational Research: Introducing the E-Value. *Ann Intern Med.* 2017;167(4):268-74.
